# Supplementary material for: Powering the ABC multidrug exporter LmrA: How nucleotides embrace the ion-motive force
Source: PubMed Central journal article supplement (PMC6155054; doi:10.1126/sciadv.aas9365), 2018-09-19
Supplement: aas9365_SM.pdf [file aas9365_SM.pdf]

## Supplementary Materials for

### Powering the ABC multidrug exporter LmrA: How nucleotides embrace the ion-motive force

Kelvin Agboh, Calvin H. F. Lau, Yvonne S. K. Khoo, Himansha Singh, Sagar Raturi, Asha V. Nair, Julie Howard, Marco Chiapello, Renata Feret, Michael J. Deery, Satoshi Murakami, Hendrik W. van Veen\*

\*Corresponding author. Email: hww20@cam.ac.uk

Published 19 September 2018, *Sci. Adv.* **4**, eaas9365 (2018)  
DOI: 10.1126/sciadv.aas9365

#### This PDF file includes:

- Fig. S1. Expression and purification of LmrA proteins.
- Fig. S2. Peptide coverage maps from the Mascot LC-MS/MS database search results.
- Fig. S3. Ion binding sites in LmrA.
- Fig. S4. Binding sites for Na<sup>+</sup> and Cl<sup>-</sup> in example proteins.
- Fig. S5. Expression and purification of LmrA-N137A mutant protein.
- Fig. S6. Conservation of residue N137 in ABC multidrug transporters.
- Table S1. Mascot search results for mass spectrometry data for purified LmrA-WT.
- Table S2. Mascot search results for mass spectrometry data for purified LmrA-ΔK388.
- Table S3. Speciation of HEPES at pH 6.5 as a function of the HEPES concentration.
- Data analysis S1. Determination of  $E_{rev}$  values and ion stoichiometry.
- Data analysis S2. Comparisons of ion transport models.

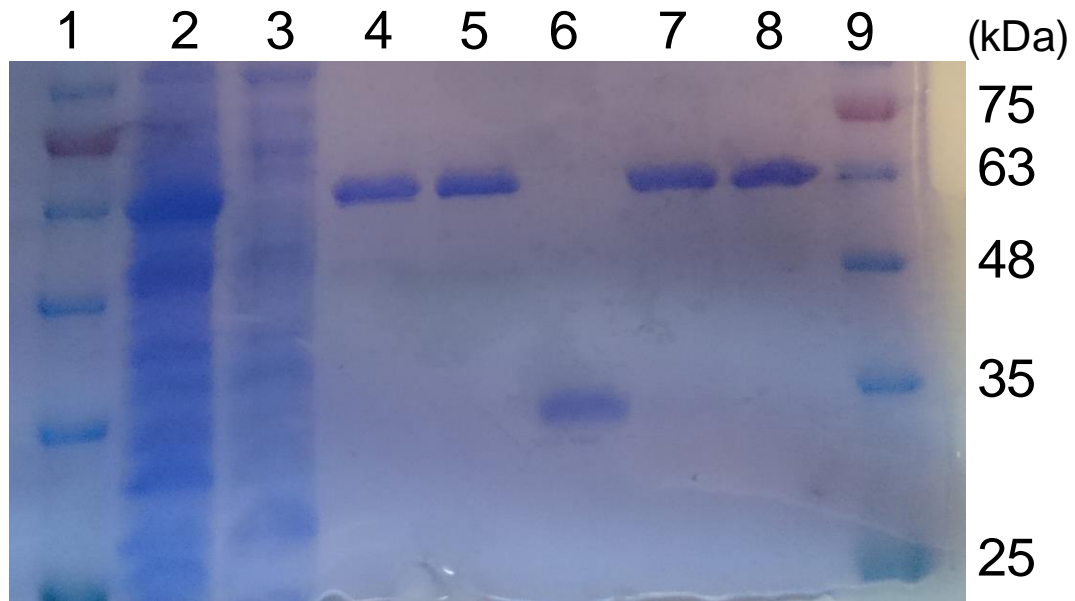

**Fig. S1. Expression and purification of LmrA proteins.** Proteins are shown on Coomassie-stained 10% SDS-PAGE. Total membrane proteins (20  $\mu$ g per lane) in membrane vesicles prepared from cells expressing LmrA-WT (lane 2), total membrane proteins in non-expressing control cells (lane 3). Lanes 4-8 are purified protein samples (10  $\mu$ g per lane) containing LmrA-WT (lane 4), LmrA- $\Delta$ K388 (lane 5), LmrA-MD protein (lane 6), LmrA-EE (lane 7), LmrA-E314A (lane 8). The migration of molecular mass markers (kDa) is indicated (lane 1 and 9).

|            |     |                           |                    |                   |                   |                   |
|------------|-----|---------------------------|--------------------|-------------------|-------------------|-------------------|
|            | 1   | MGHHHHHHDD                | DDKAERGPQM         | ANRIEGKAVD        | KTSIKHFVKL        | IRAAKPRYLF        |
|            | 51  | FVIGIVAGII                | GTLIQLQVPK         | MVQPLINSFG        | HGVNGGKVAL        | VIALYIGSAA        |
|            | 101 | VSAIAAIVLG                | <b>IFGESVVKNL</b>  | RTRVWDKMIH        | <b>LPVKYFDEVK</b> | <b>TGEMSSRLAN</b> |
|            | 151 | <b>DTTQVKNLIA</b>         | <b>NSIPQAFTSI</b>  | LLLVGSIIFM        | LQMQRRLTLA        | MIIAVPIVML        |
| LmrA-WT    | 201 | IMFPIMTFGQ                | KIGW <b>TRQDSL</b> | <b>ANFQGIASES</b> | <b>LSEIRLVKSS</b> | NAEKQASKKA        |
|            | 251 | ENDVNALYKI                | <b>GVKEAVFDGL</b>  | <b>MSPVMMLSMM</b> | LMIFGLLAYG        | IYLISTGVMS        |
|            | 301 | LGTLLGMMY                 | LMNLIGVVPT         | VATFFTELAK        | <b>ASGSTGRLTE</b> | <b>LLDEEQEVLH</b> |
|            | 351 | <b>QGDSLDEGK</b>          | <b>TLSAHHVDF</b>   | <b>YDDSEQILHD</b> | <b>ISFEAQPN</b>   | <b>IAFAGPSGGG</b> |
|            | 401 | <b>KSTIFSLLE</b>          | <b>FYQPTAGEIT</b>  | <b>IGQPIDSVS</b>  | LENWRSQIGF        | VSQDSAIMAG        |
|            | 451 | TIRENLTYGL                | <b>EGNFTDEDLW</b>  | QVLDLAFARS        | <b>FVENMPDQLN</b> | TEVGERGVKI        |
|            | 501 | SGGQRQLAI                 | ARAFLRNPKI         | <b>LMLDEATASL</b> | DSESESMVQR        | ALDSLKMGRT        |
|            | 551 | TLVIAHRLST                | <b>IVDADKIYFI</b>  | <b>EKGEITGSGK</b> | <b>HNELVATHPL</b> | <b>YAKYVSEQLT</b> |
|            | 601 | VGQ                       |                    |                   |                   |                   |
|            |     |                           |                    |                   |                   |                   |
|            | 1   | MGHHHHHHDD                | DDKAERGPQM         | ANRIEGKAVD        | KTSIKHFVKL        | IRAAKPRYLF        |
|            | 51  | FVIGIVAGII                | GTLIQLQVPK         | MVQPLINSFG        | <b>HGVNGGKVAL</b> | VIALYIGSAA        |
|            | 101 | VSAIAAIVLG                | <b>IFGESVVKNL</b>  | RTRVWDKMIH        | <b>LPVKYFDEVK</b> | <b>TGEMSSRLAN</b> |
| LmrA-ΔK388 | 151 | <b>DTTQVKNLIA</b>         | <b>NSIPQAFTSI</b>  | LLLVGSIIFM        | LQMQRRLTLA        | MIIAVPIVML        |
|            | 201 | IMFPIMTFGQ                | KIGW <b>TRQDSL</b> | <b>ANFQGIASES</b> | <b>LSEIRLVKSS</b> | NAEKQASKKA        |
|            | 251 | ENDVNALYKI                | <b>GVKEAVFDGL</b>  | <b>MSPVMMLSMM</b> | LMIFGLLAYG        | IYLISTGVMS        |
|            | 301 | LGTLLGMMY                 | LMNLIGVVPT         | VATFFTELAK        | <b>ASGSTGRLTE</b> | <b>LLDEEQEVLH</b> |
|            | 351 | <b>QGDSLDEGK</b>          | <b>TLSAHHVDF</b>   | <b>YDDSEQILHD</b> | <b>ISFEAQPN</b>   | <b>IAFAGPSGGG</b> |
|            | 401 | <b>S</b> TIFSLLE <b>R</b> | <b>YQPTAGEITI</b>  | <b>GGQPIDSVSL</b> | ENWRSQIGFV        | SQDSAIMAGT        |
|            | 451 | IRENLT <b>YGL</b>         | <b>GNFTDEDLWQ</b>  | VLDLAFARSF        | <b>VENMPDQLNT</b> | EVGERGVKIS        |
|            | 501 | GGQRQLAIA                 | RAFLRNP <b>KIL</b> | <b>MLDEATASLD</b> | SESESMVQRA        | LDSLKMGRTT        |
|            | 551 | LVIAHRL <b>STI</b>        | <b>VDADKIYFIE</b>  | <b>KGEITGSGKH</b> | <b>NELVATHPLY</b> | AKYVSEQLTV        |
|            | 601 | GQ                        |                    |                   |                   |                   |

**Fig. S2. Peptide coverage maps from the Mascot LC-MS/MS database search results.** Those stretches of sequences in LmrA-WT and LmrA-ΔK388 labelled red are peptide matches. The ΔK388 difference between the two sequences is highlighted in blue.

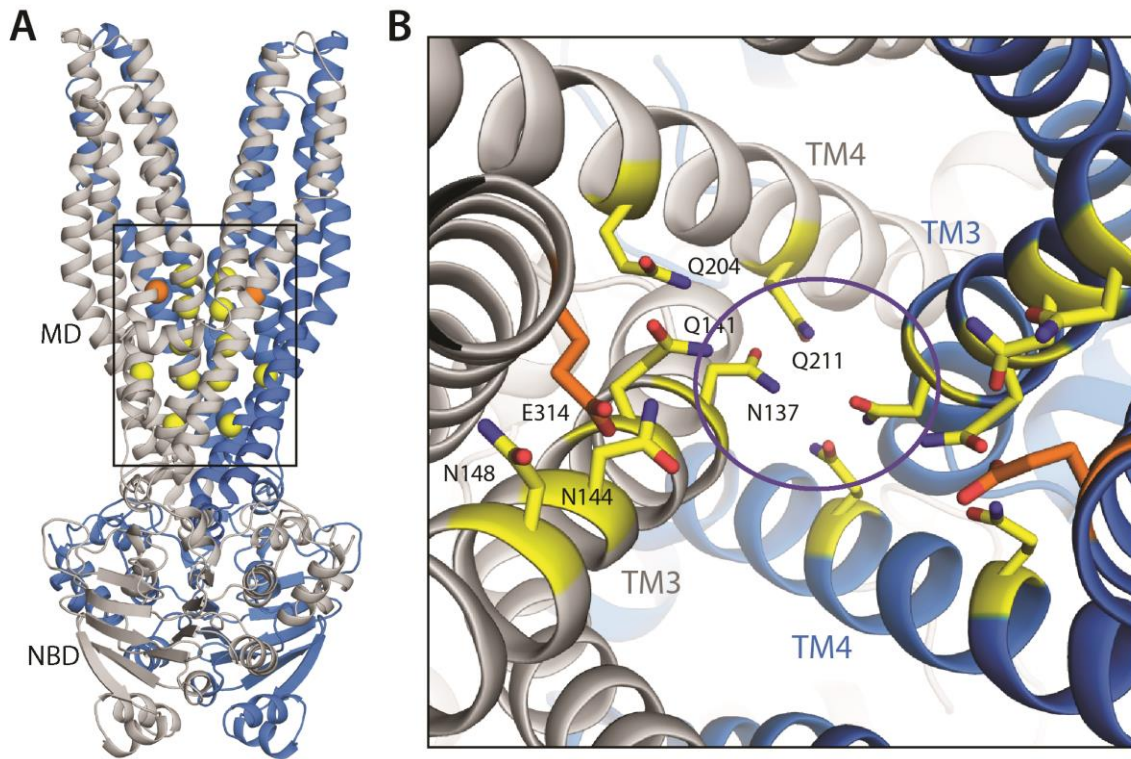

**Fig. S3. Ion binding sites in LmrA.** This homology model of LmrA (16) is based on the structure of Sav1866 in the AMP-PNP-bound outward-facing conformation (19). **(A)** View of the structure along the membrane plane; two identical protomers (marine, gray) form the functional complex. Each protomer consists of an intracellular nucleotide-binding domain (NBD) and a membrane domain (MD). **(B)** View of the interface between protomers from the extracellular side. Glu (orange), Gln and Asn (yellow) side-chains along helices TM3 and TM4 are highlighted. Proton-binding E314 is located in the interior cavity at the dimer interface in close proximity to an amide-containing face (Q141, N144, N148] in TM3. The bottom of the interior cavity contains 4 amide side chains, N137 (intracellular extension of TM3) and Q211 (intracellular extension of TM4) in each half-transporter (in blue circle) near the membrane-cytoplasm interface. The arrangement of these 4 amide residues is similar to those in known  $\text{Na}^+$  and  $\text{Cl}^-$  binding sites in a variety of proteins (see fig. S4). The position of these residues along the membrane normal is indicated in (A).



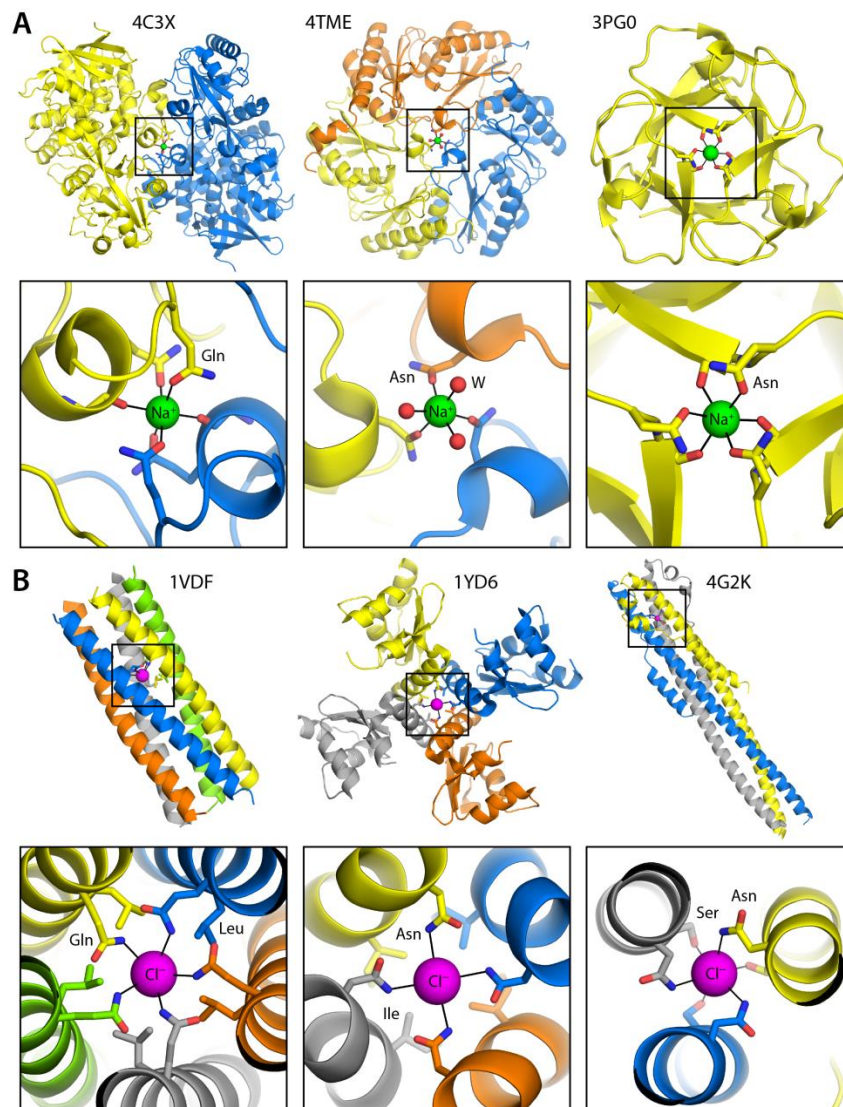

**Fig. S4. Binding sites for Na<sup>+</sup> and Cl<sup>-</sup> in example proteins.** The structures shown are a sample of those identified in a search of the Protein Data Bank (see Material and Methods) that primarily consist of Gln or Asn residues without ionisable residues. The PDB code is specified in each case. When the structure is an oligomeric assembly, each protomer is coloured separately (yellow, marine, etc.). The groups involved in direct ion coordination (side-chain, backbone, water molecules) are highlighted. **(A)** Binding sites for Na<sup>+</sup>, from left to right: 3-ketosteroid-delta 1-dehydrogenase from *Rhodococcus erythropolis* SQ1 (PDB 3C3X); EutL from *Clostridium perfringens* (PDB 4TME); designed β-trefoil-like protein (PDB 3PG0). **(B)** Binding sites for Cl<sup>-</sup>, from left to right: oligomerization domain of the Cartilage Oligomeric Matrix Protein from rat (PDB 1VDF); N-terminal endonuclease domain of UvrC from *Bacillus caldotenax* (PDB 1YD6); Marburg Virus GP2 ectodomain (PDB 4G2K).

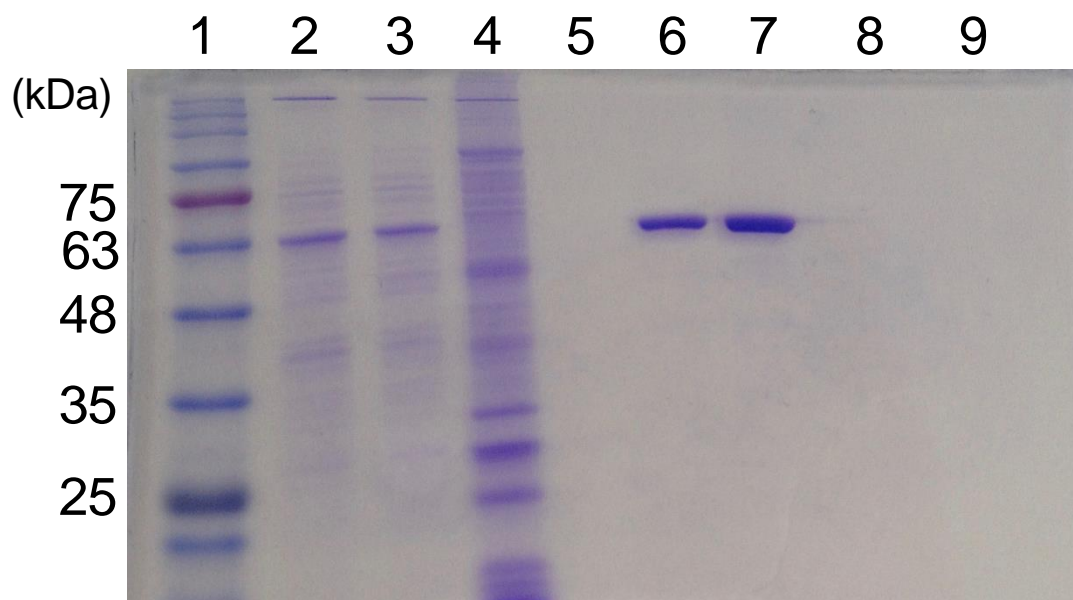

**Fig. S5. Expression and purification of LmrA-N137A mutant protein.** Proteins are shown on Coomassie-stained 10% SDS-PAGE. Total membrane proteins (5  $\mu$ g per lane) in membrane vesicles prepared from lactococcal cells expressing LmrA-WT (lane 2) or LmrA-N137A (lane 3), or from non-expressing control cells (lane 4). Both proteins are equally well expressed in the plasma membrane. Lanes 6 and 7 are samples of purified LmrA-N137A (lane 6) and LmrA-WT (lane 7), approx. 10  $\mu$ g protein per lane. The migration of molecular mass markers (kDa) is shown in lane 1.

|                                          |     |                 |     |
|------------------------------------------|-----|-----------------|-----|
| LmrA ( <i>Lactococcus lactis</i> )       | 129 | GEMSSRLANDTTQVK | 143 |
| ABCB1-C ( <i>human</i> )                 | 812 | GALTTRLANDAAQVK | 826 |
| ABCB1-N ( <i>human</i> )                 | 169 | GELNTRLTDDVSKIN | 183 |
| ABCB1a-C ( <i>mouse</i> )                | 808 | GALTTRLANDAAQVK | 822 |
| ABCB1a-N ( <i>mouse</i> )                | 165 | GELNTRLTDDVSKIN | 179 |
| HorA ( <i>Lactobacillus brevis</i> )     | 121 | GEITSRLVNDSTQVK | 135 |
| Sav1866 ( <i>Staphylococcus aureus</i> ) | 118 | GQVISRVINDVEQTK | 132 |
| BmrA ( <i>Bacillus subtilis</i> )        | 121 | GETVSRVTNDTMVVK | 135 |
| MsbA ( <i>Vibrio cholera</i> )           | 122 | GGLLSRITYDSEQVA | 136 |

**Fig. S6. Conservation of residue N137 in ABC multidrug transporters.** The first and last residues are numbered. ABCB1-C and ABCB1-N represent the C- and N-terminal halves of human ABCB1. ABCB1a-C and ABCB1a-N represent the C- and N-terminal halves of mouse ABCB1a.

**Table S1. Mascot search results for mass spectrometry data for purified LmrA-WT.**

| Name               |                                                                                                      | unique peptide sequences | emPAI |
|--------------------|------------------------------------------------------------------------------------------------------|--------------------------|-------|
| pNZHLmrA           |                                                                                                      | 39                       | 20.59 |
| P00766 CTRA_BOVIN  | Chymotrypsinogen A OS=Bos taurus                                                                     | 20                       | 200.5 |
| P35527 K1C9_HUMAN  | Keratin, type I cytoskeletal 9 OS=Homo sapiens                                                       | 6                        | 0.56  |
| P13645 K1C10_HUMAN | Keratin, type I cytoskeletal 10 OS=Homo sapiens                                                      | 6                        | 0.6   |
| P00761 TRYP_PIG    | Trypsin OS=Sus scrofa                                                                                | 3                        | 2.03  |
| P04264 K2C1_HUMAN  | Keratin, type II cytoskeletal 1 OS=Homo sapiens                                                      | 3                        | 0.23  |
| P35908 K22E_HUMAN  | Keratin, type II cytoskeletal 2 epidermal OS=Homo sapiens                                            | 3                        | 0.23  |
| P00767 CTRB_BOVIN  | Chymotrypsinogen B OS=Bos taurus                                                                     | 2                        | 0.42  |
| P02666 CASB_BOVIN  | Beta-casein OS=Bos taurus                                                                            | 1                        | 0.2   |
| Q48727 BGAL_LACLA  | Beta-galactosidase OS=Lactococcus lactis subsp. lactis (strain IL1403)                               | 1                        | 0.04  |
| Q9CDT9_LACLA       | Competence protein ComGB OS=Lactococcus lactis subsp. lactis (strain IL1403)                         | 1                        | 0.12  |
| Q9CGA1_LACLA       | Uncharacterized protein OS=Lactococcus lactis subsp. lactis (strain IL1403)                          | 1                        | 0.52  |
| Q9CF66_LACLA       | ABC transporter ATP binding and permease protein OS=Lactococcus lactis subsp. lactis (strain IL1403) | 1                        | 0.08  |
| Q9CHX7_LACLA       | Transcriptional regulator OS=Lactococcus lactis subsp. lactis (strain IL1403)                        | 1                        | 0.33  |
| Q9CJ4_LACLA        | Uncharacterized protein OS=Lactococcus lactis subsp. lactis (strain IL1403)                          | 1                        | 0.06  |
| Q9CDG4_LACLA       | ABC transporter ATP-binding protein OS=Lactococcus lactis subsp. lactis (strain IL1403)              | 1                        | 0.2   |
| Q9CJ47_LACLA       | Uncharacterized protein OS=Lactococcus lactis subsp. lactis (strain IL1403)                          | 1                        | 0.08  |
| Q9CIN1_LACLA       | ABC transporter ATP binding protein OS=Lactococcus lactis subsp. lactis (strain IL1403)              | 1                        | 0.08  |
| Q9CEI9_LACLA       | Uncharacterized protein OS=Lactococcus lactis subsp. lactis (strain IL1403)                          | 1                        | 0.23  |
| Q9CIL5 DDL_LACLA   | D-alanine--D-alanine ligase OS=Lactococcus lactis subsp. lactis (strain IL1403)                      | 1                        | 0.13  |
| Q9CH28_LACLA       | Uncharacterized protein OS=Lactococcus lactis subsp. lactis (strain IL1403)                          | 1                        | 0.18  |
| Q9CED6_LACLA       | Uncharacterized protein OS=Lactococcus lactis subsp. lactis                                          | 1                        | 0.12  |
| Q9CFX8_LACLA       | Uncharacterized protein OS=Lactococcus lactis subsp. lactis                                          | 1                        | 0.11  |
| Q9CF2_LACLA        | Uncharacterized protein OS=Lactococcus lactis subsp. lactis                                          | 1                        | 0.1   |
| Q9CE55_LACLA       | Glutamine ABC transporter permease and substrate binding protein OS=Lactococcus lactis subsp. lactis | 1                        | 0.06  |

**Table S2. Mascot search results for mass spectrometry data for purified LmrA-ΔK388.**

| Chymotrypsin Digestion |                                                                                                             |                          |        |
|------------------------|-------------------------------------------------------------------------------------------------------------|--------------------------|--------|
| Name                   |                                                                                                             | unique peptide sequences | emPAI  |
| pNZHLmrA-ΔK388         |                                                                                                             | 44                       | 29.97  |
| P00766 CTRA_BOVIN      | Chymotrypsinogen A OS=Bos taurus                                                                            | 17                       | 140.47 |
| P35527 K1C9_HUMAN      | Keratin, type I cytoskeletal 9 OS=Homo sapiens                                                              | 7                        | 0.68   |
| P04264 K2C1_HUMAN      | Keratin, type II cytoskeletal 1 OS=Homo sapiens                                                             | 6                        | 0.63   |
| P13645 K1C10_HUMAN     | Keratin, type I cytoskeletal 10 OS=Homo sapiens                                                             | 4                        | 0.37   |
| P00761 TRYP_PIG        | Trypsin OS=Sus scrofa                                                                                       | 3                        | 2.03   |
| Q7DAV2_LACLA           | Alpha-acetolactate synthase OS=Lactococcus lactis subsp. lactis                                             | 2                        | 0.16   |
| Q9CEE2 RNY_LACLA       | Ribonuclease Y OS=Lactococcus lactis subsp. lactis                                                          | 2                        | 0.17   |
| Q9CJ48_LACLA           | Dihydropolyl dehydrogenase OS=Lactococcus lactis subsp. lactis                                              | 2                        | 0.2    |
| P00767 CTRB_BOVIN      | Chymotrypsinogen B OS=Bos taurus                                                                            | 2                        | 0.42   |
| P02662 CASA1_BOVIN     | Alpha-S1-casein OS=Bos taurus                                                                               | 1                        | 0.21   |
| P01375 TNFA_HUMAN      | Tumor necrosis factor OS=Homo sapiens                                                                       | 1                        | 0.2    |
| Q9CGA1_LACLA           | Uncharacterized protein OS=Lactococcus lactis subsp. lactis                                                 | 1                        | 0.52   |
| Q9CDM5_LACLA           | DNA polymerase III, subunits beta and tau OS=Lactococcus lactis subsp. lactis                               | 1                        | 0.08   |
| Q48727 BGAL_LACLA      | Beta-galactosidase OS=Lactococcus lactis subsp. lactis                                                      | 1                        | 0.04   |
| P02666 CASB_BOVIN      | Beta-casein OS=Bos taurus                                                                                   | 1                        | 0.2    |
| Q9CJA0_LACLA           | ABC transporter ATP binding protein OS=Lactococcus lactis subsp. lactis                                     | 1                        | 0.08   |
| Q9CG38_LACLA           | ABC transporter ABC binding and permease protein OS=Lactococcus lactis subsp. lactis                        | 1                        | 0.07   |
| Q9CG28 MURI_LACLA      | Glutamate racemase OS=Lactococcus lactis subsp. lactis                                                      | 1                        | 0.16   |
| Q9CHK0 MEND_LACLA      | 2-succinyl-5-enolpyruvyl-6-hydroxy-3-cyclohexene-1-carboxylate synthase OS=Lactococcus lactis subsp. lactis | 1                        | 0.08   |
| Q9CJ4_LACLA            | Uncharacterized protein OS=Lactococcus lactis subsp. lactis                                                 | 1                        | 0.06   |
| Q9CH7_LACLA            | Uncharacterized protein OS=Lactococcus lactis subsp. lactis                                                 | 1                        | 0.06   |
| Q9CGS6_LACLA           | Prophage pi2 protein 11, topoisomerase OS=Lactococcus lactis subsp. lactis                                  | 1                        | 0.21   |
| Q9CDT9_LACLA           | Competence protein ComGB OS=Lactococcus lactis subsp. lactis                                                | 1                        | 0.12   |
| Q9CDG5_LACLA           | Uncharacterized protein OS=Lactococcus lactis subsp. lactis                                                 | 1                        | 0.13   |
| Q01999 TRPC_LACLA      | Indole-3-glycerol phosphate synthase OS=Lactococcus lactis subsp. lactis                                    | 1                        | 0.17   |
| P49016 MENG_LACLA      | Demethylmenaquinone methyltransferase OS=Lactococcus lactis subsp. lactis                                   | 1                        | 0.18   |
| Q9CHV0 HPRK_LACLA      | HPr kinase/phosphorylase OS=Lactococcus lactis subsp. lactis                                                | 1                        | 0.14   |
| Q9CF2_LACLA            | Uncharacterized protein OS=Lactococcus lactis subsp. lactis                                                 | 1                        | 0.1    |
| Q9CEJ4 MNMG_LACLA      | tRNA uridine 5-carboxymethylaminomethyl modification enzyme MnmG OS=Lactococcus lactis subsp. lactis        | 1                        | 0.07   |
| Q9CDV8_LACLA           | Threonine synthase OS=Lactococcus lactis subsp. lactis                                                      | 1                        | 0.09   |

## Data analysis S1. Determination of $E_{rev}$ values and ion stoichiometry.

We consider a thermodynamic reaction cycle involving the coupled transport of  $n_{Na}$  sodium ions from the outside to the inside of the phospholipid bilayer, and  $n_{Cl}$  chloride ions,  $n_H$  protons, and  $n_D$  drug molecules from the inside to the outside, with  $z_{Na}$ ,  $z_{Cl}$ ,  $z_H$ , and  $z_D$  representing the charge of these ions. At equilibrium, the free energies of the coupled ions define a zero-flux equation relating the reversal potential ( $E_{rev}$ ) to the transmembrane ion gradients:

$$E_{rev} = \frac{1}{z_{Na}n_{Na} - z_{Cl}n_{Cl} - z_Hn_H - z_Dn_D} * \frac{2.303 RT}{F} \log \left[ \left( \frac{[Na^+]_{out}}{[Na^+]_{in}} \right)^{n_{Na}} * \left( \frac{[Cl^-]_{out}}{[Cl^-]_{in}} \right)^{-n_{Cl}} * \left( \frac{[H^+]_{out}}{[H^+]_{in}} \right)^{-n_H} * \left( \frac{[D^+]_{out}}{[D^+]_{in}} \right)^{-n_D} \right] \quad (\text{Eq. 1})$$

$$E_{rev} = \frac{1}{n_{Na} + n_{Cl} - n_H - n_D} * \frac{2.303 RT}{F} \log \left[ \left( \frac{[Na^+]_{out}}{[Na^+]_{in}} \right)^{n_{Na}} * \left( \frac{[Cl^-]_{out}}{[Cl^-]_{in}} \right)^{-n_{Cl}} * \left( \frac{[H^+]_{out}}{[H^+]_{in}} \right)^{-n_H} * \left( \frac{[D^+]_{out}}{[D^+]_{in}} \right)^{-n_D} \right] \quad (\text{Eq. 2})$$

### (A) Imposition of $Na^+$ gradients

With the  $[Cl^-]_{in} = [Cl^-]_{out}$ ,  $[H^+]_{in} = [H^+]_{out}$ ,  $[HEPES^+]_{in} = [HEPES^+]_{out}$ , Eq. 2 transforms into:

$$E_{rev} = \frac{1}{n_{Na} + n_{Cl} - n_H - n_D} * \frac{2.303 RT}{F} \log \left[ \left( \frac{[Na^+]_{out}}{[Na^+]_{in}} \right)^{n_{Na}} \right] \quad (\text{Eq. 3})$$

With  $[Na^+]_{in} = 60$  mM, Eq. 3 transforms into:

$$E_{rev} = \frac{n_{Na}}{n_{Na} + n_{Cl} - n_H - n_D} * \frac{2.303 RT}{F} \log \left[ \left( \frac{[Na^+]_{out}}{60 \text{ mM}} \right) \right]$$

$$E_{rev} = \frac{n_{Na}}{n_{Na} + n_{Cl} - n_H - n_D} * \frac{2.303 RT}{F} \log [Na^+]_{out} - \frac{n_{Na}}{n_{Na} + n_{Cl} - n_H - n_D} * \frac{2.303 RT}{F} \log 60 \text{ mM}$$

$E_{rev}$  was measured as a function of  $^{10} \log [Na^+]_{out}$  at concentrations of 60 mM, 100 mM, 150 mM and 200 mM (Fig. 2G), and followed a linear relationship  $y = a \log x - b$

$$\text{slope } (a) = \frac{\Delta E_{rev}}{\Delta \log [Na^+]_{out}} = \frac{n_{Na}}{n_{Na} + n_{Cl} - n_H - n_D} * 59.1 \text{ mV} = 104.6 \pm 5.3 \text{ mV (experimental value)}$$

$$\frac{n_{Na}}{n_{Na} + n_{Cl} - n_H - n_D} = 1.8 \pm 0.1 \quad (\text{Eq. 4})$$

### (B) Imposition of $Cl^-$ gradients

With the  $[Na^+]_{in} = [Na^+]_{out}$ ,  $[H^+]_{in} = [H^+]_{out}$ ,  $[HEPES^+]_{in} = [HEPES^+]_{out}$ , and  $[Cl^-]_{in} = 60$  mM, Eq. 2 transforms into:

$$E_{rev} = \frac{-n_{Cl}}{n_{Na} + n_{Cl} - n_H - n_D} * \frac{2.303 RT}{F} \log \left[ \left( \frac{[Cl^-]_{out}}{60 \text{ mM}} \right) \right]$$

$E_{rev}$  was measured as a function of  $[Cl^-]_{out} = 60$  mM, 100 mM, 150 mM and 200 mM.



In Fig. 2G:  $slope = \frac{\Delta E_{rev}}{\Delta \log[Cl^-]_{out}} = -\frac{n_{Cl}}{n_{Na}+n_{Cl^-}-n_H-n_D} * 59.1 \text{ mV} = -59.1 \pm 7.8 \text{ mV (exp. value)}$

$$\frac{n_{Cl}}{n_{Na}+n_{Cl^-}-n_H-n_D} = 1.0 \pm 0.1 \text{ (Eq. 5)}$$

### (C) Imposition of HEPES<sup>+</sup> gradients

HEPES can exist in the form of monovalent cationic, zwitterionic, and monovalent anionic species, and has two protonatable moieties, a piperazin moiety with pKa<sub>1</sub> of 3, and a sulfonate moiety with pKa<sub>2</sub> of 7.5 (20 °C) in the following equilibria:

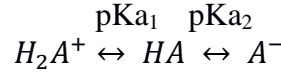

in which H<sub>2</sub>A<sup>+</sup>, HA and A<sup>-</sup> refer to the double protonated form (HEPES<sup>+</sup>, protonated on piperazin and sulfonate moiety), zwitterionic form (HEPES<sup>0</sup>, protonated on piperazin moiety only) and double deprotonated form of HEPES (HEPES<sup>-</sup>). Using the Henderson–Hasselbalch equation, the speciation at pH 6.5 was calculated:

**Table S3. Speciation of HEPES at pH 6.5 as a function of the HEPES concentration.**

| HEPES                     | 10 mM                | 25 mM                | 100 mM               | 125 mM               |
|---------------------------|----------------------|----------------------|----------------------|----------------------|
| [HEPES <sup>+</sup> ] (M) | 2.9*10 <sup>-7</sup> | 7.3*10 <sup>-7</sup> | 2.9*10 <sup>-6</sup> | 3.6*10 <sup>-6</sup> |
| [HEPES <sup>0</sup> ] (M) | 9.1*10 <sup>-4</sup> | 2.3*10 <sup>-3</sup> | 9.1*10 <sup>-3</sup> | 1.1*10 <sup>-2</sup> |
| [HEPES <sup>-</sup> ] (M) | 9.1*10 <sup>-3</sup> | 2.3*10 <sup>-2</sup> | 9.1*10 <sup>-2</sup> | 1.1*10 <sup>-1</sup> |

With [Na<sup>+</sup>]<sub>in</sub> = [Na<sup>+</sup>]<sub>out</sub>, [H<sup>+</sup>]<sub>in</sub> = [H<sup>+</sup>]<sub>out</sub> (fixed at pH = 6.5), [Cl<sup>-</sup>]<sub>in</sub> = [Cl<sup>-</sup>]<sub>out</sub>, [HEPES<sup>+</sup>]<sub>in</sub> = 2.9\*10<sup>-7</sup> M and [HEPES<sup>+</sup>]<sub>out</sub> set at 2.9\*10<sup>-7</sup> M, 7.3\*10<sup>-7</sup> M, 2.9\*10<sup>-6</sup> M or 3.6\*10<sup>-6</sup> M, Eq. 2 transforms into:

$$E_{rev} = \frac{-n_D}{n_{Na}+n_{Cl^-}-n_H-n_D} * \frac{2.303 RT}{F} \log \left[ \left( \frac{[HEPES^+]_{out}}{2.9 \exp^{-7} \text{ M}} \right) \right]$$

In Fig. 2G:

$$slope = \frac{\Delta E_{rev}}{\Delta \log[HEPES^+]_{out}} = -\frac{n_D}{n_{Na}+n_{Cl^-}-n_H-n_D} * 59.1 \text{ mV} = -51.1 \pm 4.9 \text{ mV (exp. value)}$$

$$\frac{n_D}{n_{Na}+n_{Cl^-}-n_H-n_D} = 0.9 \pm 0.1 \text{ (Eq. 6)}$$

### (D) Ion stoichiometry

Our measurements of  $E_{rev}$  yielded the following system of equations:

$$\text{Eq. 4: } \frac{n_{Na}}{n_{Na}+n_{Cl^-}-n_H-n_D} = 1.8 \pm 0.1, \quad \text{Eq. 5: } \frac{n_{Cl}}{n_{Na}+n_{Cl^-}-n_H-n_D} = 1.0 \pm 0.1,$$

$$\text{and Eq. 6: } \frac{n_D}{n_{Na}+n_{Cl^-}-n_H-n_D} = 0.9 \pm 0.1$$

In our previous measurements of the chemical proton gradient-dependent transport of radioactive  $^{36}\text{Cl}^-$  in LmrA-containing proteoliposomes, we directly established that LmrA mediates the symport of  $\text{Cl}^-$  and proton with the stoichiometry of 1:1 (10).

Therefore,  $n_H = n_{Cl}$  (Eq. 7)

Our observations for symmetrical NaCl-containing buffer solutions that the ATP-induced ion conductance by LmrA-WT is directly proportional to the imposed membrane voltage (Fig. 2H) demonstrates the transbilayer movement of one positive charge per transport cycle, with the term:

$$\frac{1}{n_{Na} + n_{Cl} - n_H - n_D} = 1 \text{ in Eq. 2. Hence, } n_{Na} + n_{Cl} - n_H - n_D = 1 \text{ (Eq. 8)}$$

Taken together, Equations 4 - 8 indicate that the number of ions per transport cycle is  $n_{Na} = 2$ ,  $n_{Cl} = 1$ ,  $n_H = 1$ , and  $n_D = 1$

In the schematic below, *in* and *out* refer to the inside and outside of the membrane in lactococcal cells.

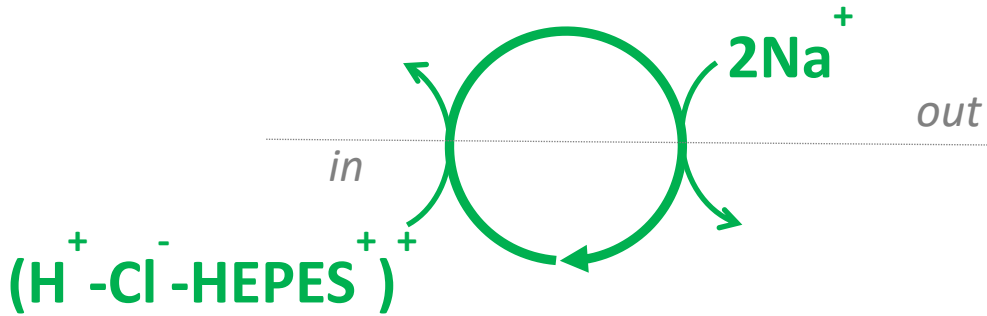

### (E) Tests of the model by simultaneous changes of ion concentrations

#### E1. Change in $[\text{NaCl}]_{in}/[\text{NaCl}]_{out}$ from 10 mM/10 mM to $[\text{NaCl}]_{in}/[\text{NaCl}]_{out}$ 10 mM/150 mM

With  $[\text{H}^+]_{in} = [\text{H}^+]_{out}$ ,  $[\text{HEPES}^+]_{in} = [\text{HEPES}^+]_{out}$ ,  $[\text{Na}^+]_{in} = [\text{Cl}^-]_{in} = 10 \text{ mM}$ , and simultaneous change in  $[\text{Na}^+]_{out}$  and  $[\text{Cl}^-]_{out}$  to 150 mM NaCl, Eq. 2 transforms into:

$$E_{rev} = \frac{1}{n_{Na} + n_{Cl} - n_H - n_D} * \frac{2.303RT}{F} \log \left[ \left( \frac{[\text{Na}^+]_{out}}{[\text{Na}^+]_{in}} \right)^{n_{Na}} * \left( \frac{[\text{Cl}^-]_{out}}{[\text{Cl}^-]_{in}} \right)^{-n_{Cl}} \right]$$

$$E_{rev} = \frac{1}{n_{Na} + n_{Cl} - n_H - n_D} * \frac{2.303RT}{F} \log \left( \frac{150}{10} \right)^2 * \left( \frac{150}{10} \right)^{-1}$$

$$E_{rev} = \frac{1}{n_{Na} + n_{Cl} - n_H - n_D} * \frac{2.303RT}{F} \log (225 * 0.0667)$$

$$E_{rev} = \frac{1}{n_{Na} + n_{Cl} - n_H - n_D} * \frac{2.303RT}{F} \log 15.08$$

$$E_{rev} = \frac{1}{n_{Na} + n_{Cl} - n_H - n_D} * \frac{2.303RT}{F} * 1.176 = 69.5 \text{ mV}$$

The calculated  $E_{rev}$  value of 69.5 mV is close to the experimental  $E_{rev}$  value of  $66.7 \pm 6.1$  mV ( $n = 3$ ) (Fig. 2H).

**E2. Change in  $[NaCl]_{in}/[NaCl]_{out}$  from 10 mM/10 mM to  $[Na^+]_{in}/[Na^+]_{out}$  50 mM/100 mM with  $[Cl^-]_{in} = [Cl^-]_{out} = 50$  mM**

With  $[H^+]_{in} = [H^+]_{out}$ ,  $[HEPES^+]_{in} = [HEPES^+]_{out}$ ,  $[Cl^-]_{in} = [Cl^-]_{out}$ , and  $[Na^+]_{in}/[Na^+]_{out}$  of 50 mM /100 mM, Eq. 2 transforms into:

$$E_{rev} = \frac{1}{n_{Na} + n_{Cl} - n_H - n_D} * \frac{2.303RT}{F} \log \left( \frac{[Na^+]_{out}}{[Na^+]_{in}} \right)^{n_{Na}}$$

$$E_{rev} = \frac{1}{n_{Na} + n_{Cl} - n_H - n_D} * \frac{2.303RT}{F} \log \left( \frac{100}{50} \right)^2$$

$$E_{rev} = \frac{1}{n_{Na} + n_{Cl} - n_H - n_D} * \frac{2.303RT}{F} \log 4 = 35.6 \text{ mV}$$

The calculated  $E_{rev}$  value of 35.6 mV is close to the experimental  $E_{rev}$  value of  $37.6 \pm 1.5$  mV ( $n = 3$ ) (Fig. 2H)

Hence, the model correctly predicts  $E_{rev}$  in response to simultaneous changes in ion gradients.

## Data analysis S2. Comparisons of ion transport models.

(A) In previous work, Velamakanni and co-workers (10) focused on electrogenic proton-chloride symport by LmrA-MD and LmrA, and proposed that this reaction is based on apparent  $(1\text{H}^+ - 1\text{X}^+ - 1\text{Cl}^-)^+$  co-transport in which  $\text{X}^+$  can be  $\text{Na}^+$  or  $\text{Drug}^+$  (Model 1). The transport of  $100 \mu\text{M}$   $^{36}\text{Cl}^-$  [added as  $\text{NaCl}$ ] was measured in proteoliposomes containing transport proteins in an inside-out fashion. In the following calculations, the predicted direction of transport and accumulation of  $^{36}\text{Cl}^-$  for Model 1 and  $2\text{Na}^+/(1\text{H}^+ - 1\text{Drug}^+ - 1\text{Cl}^-)^+$  exchange (Model 2) are compared with the experimental data.

### A1. $\Delta\text{pH}$ -dependent accumulation of $^{36}\text{Cl}^-$

To artificially impose a chemical proton gradient ( $\Delta\text{pH}$ , interior alkaline), the proteoliposomes were prepared in 20 mM (K)PIPES (pH 7.6) containing 100 mM (K)acetate, and diluted 100-fold into 20 mM (K)PIPES (pH 6.8) containing 100 mM (K)MES. With the imposed  $\Delta\text{pH} = 0.8$  (equivalent to  $-47 \text{ mV}$ ), a 4.4-fold accumulation of  $^{36}\text{Cl}^-$  above the equilibration level in empty liposomes was observed (equivalent to  $-38 \text{ mV}$ ).

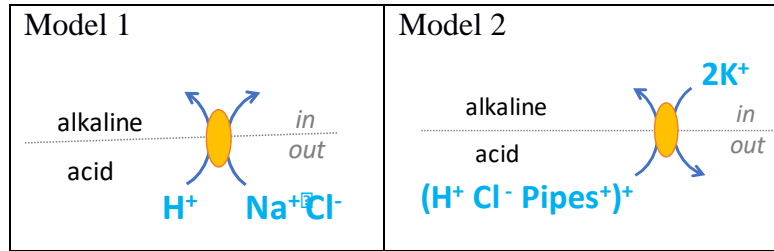

Model 1. Driving force for transport by Model 1 equals:

$$(z_{\text{NaCl}}n_{\text{NaCl}} + z_{\text{H}}n_{\text{H}})\Delta\psi - \frac{2.303 RT}{F} \log \left[ \left( \frac{[\text{NaCl}]_{\text{out}}}{[\text{NaCl}]_{\text{in}}} \right)^{n_{\text{NaCl}}} * \left( \frac{[\text{H}^+]_{\text{out}}}{[\text{H}^+]_{\text{in}}} \right)^{n_{\text{H}}} \right] \quad (\text{Eq. 9})$$

At steady-state with imposed  $\Delta\text{pH}$  only (membrane potential ( $\Delta\psi$ ) =  $0 \text{ mV}$ ),  $z_{\text{NaCl}} = 0$ ,  $z_{\text{H}} = +1$ ,  $n_{\text{NaCl}} = 2$  and  $n_{\text{H}} = 1$ , Eq. 9 transforms into:

$$\frac{2.303 RT}{F} \log \left[ \left( \frac{[\text{NaCl}]_{\text{out}}}{[\text{NaCl}]_{\text{in}}} \right)^2 * \left( \frac{[\text{H}^+]_{\text{out}}}{[\text{H}^+]_{\text{in}}} \right)^1 \right] = 0$$

$$2 * 59.1 * \log \frac{[\text{NaCl}]_{\text{in}}}{[\text{NaCl}]_{\text{out}}} = 59.1 * \log \frac{10^{-6.8}}{10^{-7.6}}$$

$$\log \frac{[\text{NaCl}]_{\text{in}}}{[\text{NaCl}]_{\text{out}}} = \frac{59.1 * \log \frac{10^{-6.8}}{10^{-7.6}}}{118.2} = 0.4$$

$$\frac{[\text{NaCl}]_{\text{in}}}{[\text{NaCl}]_{\text{out}}} = 2.5$$

With the imposed  $\Delta\text{pH}$  (interior alkaline), Model 1 predicts the 2.5-fold accumulation of  $^{36}\text{Cl}^-$  in the lumen of the proteoliposomes.

*Model 2.* As shown in Fig. 1,  $\text{Na}^+$  in the  $2\text{Na}^+/(1\text{H}^+-1\text{D}^+-1\text{Cl}^-)^+$  exchange reaction can to some extent be replaced by  $\text{K}^+$ . The driving force for transport via  $2\text{K}^+/(1\text{H}^+-1\text{D}^+-1\text{Cl}^-)^+$  exchange in the presence of  $100 \mu\text{M } ^{36}\text{Cl}^-$  would equal:

$$(z_K n_K - z_{Cl} n_{Cl} - z_H n_H - z_D n_D) * \Delta\psi - \frac{2.303 RT}{F} \log \left[ \left( \frac{[\text{K}^+]_{out}}{[\text{K}^+]_{in}} \right)^{n_K} * \left( \frac{[\text{Cl}^-]_{out}}{[\text{Cl}^-]_{in}} \right)^{-n_{Cl}} * \left( \frac{[\text{H}^+]_{out}}{[\text{H}^+]_{in}} \right)^{-n_H} * \left( \frac{[\text{D}^+]_{out}}{[\text{D}^+]_{in}} \right)^{-n_D} \right] \quad (\text{Eq. 10})$$

At steady-state with  $[\text{K}^+]_{in} = [\text{K}^+]_{out}$ ,  $[\text{D}]_{in} \sim [\text{D}]_{out}$  (PIPES),  $\Delta\psi = 0 \text{ mV}$ ,  $z_{Na} = +1$ ,  $z_{Cl} = -1$ ,  $z_H = +1$ ,  $z_D = +1$ ,  $n_K = 2$ ,  $n_{Cl} = 1$ ,  $n_H = 1$ ,  $n_D = 1$ , and with imposed  $\Delta\text{pH}$  only, Eq. 10 transforms into:

$$-\frac{2.303 RT}{F} \log \left[ \left( \frac{[\text{Cl}^-]_{out}}{[\text{Cl}^-]_{in}} \right)^{-1} * \left( \frac{[\text{H}^+]_{out}}{[\text{H}^+]_{in}} \right)^{-1} \right] = 0$$

$$\log \frac{[\text{Cl}^-]_{out}}{[\text{Cl}^-]_{in}} = \frac{-59.1 * \log \frac{10^{-6.8}}{10^{-7.6}}}{59.1} = -0.8$$

$$\frac{[\text{Cl}^-]_{in}}{[\text{Cl}^-]_{out}} = 6.3$$

Hence, the predicted  $\Delta\text{pH}$  (interior alkaline)-dependent accumulation of  $^{36}\text{Cl}^-$  in Model 2 of 6.3-fold is close to the experimentally observed accumulation, and is in a similar range as the predicted value in Model 1.

## A2. $\Delta\psi$ -dependent accumulation of $^{36}\text{Cl}^-$

To artificially impose a  $\Delta\psi$ , the proteoliposomes were prepared in 20 mM (K)Pipes (pH 7.6) containing 100 mM K-acetate, and diluted 100-fold into 20 mM N-methyl-D-glucosamine (NMG) Pipes (pH 7.6) containing 100 mM (NMG) acetate in the presence of valinomycin to induce a potassium diffusion potential ( $\Delta\psi$ , interior negative) of -118.2 mV. The proteoliposomes accumulated  $^{36}\text{Cl}^-$  about 17.4-fold above the equilibration level obtained for empty liposomes.

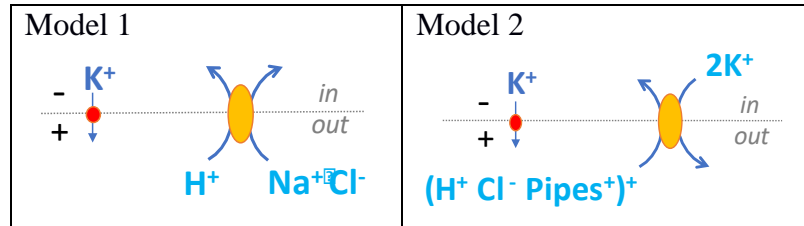

*Model 1.* Driving force for transport by Model 1 equals:

$$(z_{NaCl} n_{NaCl} + z_H n_H) \Delta\psi - \frac{2.303 RT}{F} \log \left[ \left( \frac{[\text{NaCl}]_{out}}{[\text{NaCl}]_{in}} \right)^{n_{NaCl}} * \left( \frac{[\text{H}^+]_{out}}{[\text{H}^+]_{in}} \right)^{n_H} \right] \quad (\text{see Eq. 9})$$



At steady-state with  $[H^+]_{in} = [H^+]_{out}$ ,  $\Delta\psi = -118.2 \text{ mV}$ , the equation transforms into:

$$\Delta\psi - 59.1 * \log \left( \frac{[NaCl]_{out}}{[NaCl]_{in}} \right)^2 = 0$$

$$-118.2 = 118.2 * \log \left( \frac{[NaCl]_{out}}{[NaCl]_{in}} \right)$$

$$\log \left( \frac{[NaCl]_{out}}{[NaCl]_{in}} \right) = -1$$

$$\frac{[NaCl]_{in}}{[NaCl]_{out}} = 10$$

With the imposed  $\Delta\psi$  (interior negative), Model 1 predicts a 10-fold accumulation of  $^{36}\text{Cl}^-$  in the lumen of the proteoliposomes.

*Model 2.* The driving force for transport by Model 2 equals:

$$(z_K n_K - z_{Cl} n_{Cl} - z_H n_H - z_D n_D) * \Delta\psi - \frac{2.303 RT}{F} \log \left[ \left( \frac{[K^+]_{out}}{[K^+]_{in}} \right)^{n_K} * \left( \frac{[Cl^-]_{out}}{[Cl^-]_{in}} \right)^{-n_{Cl}} * \left( \frac{[H^+]_{out}}{[H^+]_{in}} \right)^{-n_H} * \left( \frac{[D^+]_{out}}{[D^+]_{in}} \right)^{-n_D} \right] \text{ (see Eq. 10)}$$

At steady-state with the  $[H^+]_{in} = [H^+]_{out}$ ,  $[D^+]_{in} = [D^+]_{out}$  (PIPES), the equation transforms into:

$$\Delta\psi - \frac{2.303 RT}{F} \log \left[ \left( \frac{[K^+]_{out}}{[K^+]_{in}} \right)^{n_K} * \left( \frac{[Cl^-]_{out}}{[Cl^-]_{in}} \right)^{-n_{Cl}} \right] = 0$$

$$\Delta\psi - \frac{2.303 RT}{F} \log \left[ \left( \frac{[K^+]_{out}}{[K^+]_{in}} \right)^{n_K} \right] = \frac{2.303 RT}{F} \log \left[ \left( \frac{[Cl^-]_{out}}{[Cl^-]_{in}} \right)^{-n_{Cl}} \right]$$

with  $n_K = 2$ ,  $n_{Cl} = 1$  and  $\Delta\psi = -118.2 \text{ mV}$ ,

$$-118.2 \text{ mV} - 59.1 * \log \left( \frac{1.2 \text{ mM}}{120 \text{ mM}} \right)^2 = -59.1 * \log \left( \frac{[Cl^-]_{out}}{[Cl^-]_{in}} \right)$$

$$\log \left( \frac{[Cl^-]_{out}}{[Cl^-]_{in}} \right) = \frac{-118.2 \text{ mV} - (59.1 * -4 \text{ mV})}{-59.1 \text{ mV}} = -2$$

$$\frac{[Cl^-]_{in}}{[Cl^-]_{out}} = 100$$

Model 2 predicts a 100-fold accumulation of  $^{36}\text{Cl}^-$  in the lumen of the proteoliposomes.

## Conclusions

With the imposed electrochemical ion gradients in the proteoliposomes, Model 2 and Model 1 predict  $\text{Cl}^-$  accumulation in a similar range as the experimental values obtained in the study by Velamakanni and co-workers (10). This conclusion is further supported by the notion that the

imposed  $\Delta\psi$  (based on a potassium diffusion potential) will have been short-lived due to the export of  $K^+$  from the lumen of the proteoliposomes via valinomycin (Model 1) and valinomycin and LmrA (Model 2).

Model 1 [(1H<sup>+</sup>-1X<sup>+</sup>-1Cl<sup>-</sup>)<sup>+</sup> co-transport] was the simplest model that explained the <sup>36</sup>Cl<sup>-</sup> accumulation data with the proteoliposomes. Based on our electrophysiological data and further observations in proteoliposomes and intact cells, Model 1 has now been extended to Model 2 [(1H<sup>+</sup>-1drug<sup>+</sup>-1Cl<sup>-</sup>)<sup>+</sup> / 2Na<sup>+</sup> antiport].

## (B) Further comparisons of ion transport models

In the electrophysiological experiments in Fig. 2H, the imposition of asymmetric solutions ([NaCl]<sub>in</sub>/[NaCl]<sub>out</sub> = 10 mM/150 mM) yielded a measured  $E_{rev} = 66.7 \pm 6.1$  mV and calculated  $E_{rev} = 70.5$  mV based on Model 2 (data analyses S1 E1).

In the following section the  $E_{rev}$  is calculated using Model 1.

$$E_{rev} = \frac{1}{(z_{NaCl}n_{NaCl} + z_Hn_H)} * \frac{2.303 RT}{F} \log \left[ \left( \frac{[NaCl]_{out}}{[NaCl]_{in}} \right)^{n_{NaCl}} * \left( \frac{[H^+]_{out}}{[H^+]_{in}} \right)^{n_H} \right] \text{ (based on Eq. 9)}$$

With separate additions of Na<sup>+</sup> and Cl<sup>-</sup> in the experiments in Fig. 2H, this equation can be adapted to:

$$E_{rev} = \frac{1}{n_{Na} - n_{Cl} + n_H} * \frac{2.303 RT}{F} \log \left[ \left( \frac{[Na^+]_{out}}{[Na^+]_{in}} \right)^{n_{Na}} * \left( \frac{[Cl^-]_{out}}{[Cl^-]_{in}} \right)^{n_{Cl}} * \left( \frac{[H^+]_{out}}{[H^+]_{in}} \right)^{n_H} \right]$$

At steady-state with  $[H^+]_{in} = [H^+]_{out}$ ,  $n_{Na} = 1$ ,  $n_{Cl} = 1$  and  $n_H = 1$

$$E_{rev} = \frac{2.303 RT}{F} \log \left[ \left( \frac{[Na^+]_{out}}{[Na^+]_{in}} \right)^1 * \left( \frac{[Cl^-]_{out}}{[Cl^-]_{in}} \right)^1 \right]$$

$$E_{rev} = 59.1 * \log \left[ \left( \frac{150 \text{ mM}}{10 \text{ mM}} \right) * \left( \frac{150 \text{ mM}}{10 \text{ mM}} \right) \right] = 139 \text{ mV}$$

## Conclusion

Model 2 has a better predictive value of  $E_{rev}$  than Model 1.
